# Supplementary material for: Machine learning based models for high-throughput classification of human pregnane X receptor activators
Source: Royal Society of Chemistry journal article supplement (doi:10.1039/d2va00182a), 2022-12-23
Supplement: d2va00182a1.pdf [file d2va00182a1.pdf]

**Supporting Information**

**Machine learning-based models for high-throughput classification of human pregnane X receptor activators**

Yiyuan Gou<sup>†, ‡</sup>, Lilai Shen<sup>†</sup>, Shixuan Cui<sup>†, ‡, \*</sup>, Meiling Huang<sup>†</sup>, Yiqu Wu<sup>†</sup>, Penghan Li<sup>†</sup>, Shulin Zhuang<sup>†, ‡, \*</sup>

<sup>†</sup> Key Laboratory of Environment Remediation and Ecological Health, Ministry of Education, College of Environmental and Resource Sciences, Zhejiang University, Hangzhou 310058, China.

<sup>‡</sup> Women's Reproductive Health Key Laboratory of Zhejiang Province, Women's Hospital, School of Medicine, Zhejiang University, Hangzhou 310006, China.

\* Corresponding author: College of Environmental and Resource Sciences, Zhejiang University, Hangzhou 310058, China. Email address: [sxcui@zju.edu.cn](mailto:sxcui@zju.edu.cn) (S Cui) or [shulin@zju.edu.cn](mailto:shulin@zju.edu.cn) (S Zhuang).

This file contains 1 text, 6 tables and 1 figure.

## Text S1. Model evaluation metrics

Balanced accuracy reflects the accuracy of the model especially when data sets are imbalanced. Precision measures the ability of the classifier not to label as positive a sample that is negative, and recall measures the ability of the classifier to find all the positive samples. The F1 score is the harmonic mean of the precision and recall. Receiver operating characteristic curve (ROC) can graphically present the model performance in a visual way. The area under the curve (AUC) shows the ability of the model to separate classes. Another metric of model classification performance is MCC, which only generates a high score when both positive and negative instances are correctly predicted. Cohen's Kappa (CK) is used to measure overall model performance by normalizing the accuracy to the probability that the classification would agree.

$$\text{balanced accuracy} = \frac{\frac{N_{TP}}{N_{TP} + N_{FN}} + \frac{N_{TN}}{N_{TN} + N_{FP}}}{2}$$

$$\text{precision} = \frac{N_{TP}}{N_{TP} + N_{FP}}$$

$$\text{recall} = \frac{N_{TP}}{N_{TP} + N_{FN}}$$

$$\text{F1 score} = 2 \frac{\text{precision} \cdot \text{recall}}{\text{precision} + \text{recall}}$$

$$\text{CK} = \frac{\text{Accuracy} - p_e}{1 - p_e}$$

$$\text{MCC} = \frac{N_{TP} \cdot N_{TN} - N_{FP} \cdot N_{FN}}{\sqrt{(N_{TP} + N_{FP})(N_{TP} + N_{FN})(N_{TN} + N_{FP})(N_{TN} + N_{FN})}}$$

where  $N_{TP}$ ,  $N_{TN}$ ,  $N_{FP}$ , and  $N_{FN}$  represent the number of true positive, true negative, false positive, and false negative, respectively.  $p_e = p_{\text{True}} + p_{\text{False}}$ , where

$$p_{\text{True}} = \frac{N_{TP} + N_{FN}}{N_{TP} + N_{TN} + N_{FP} + N_{FN}} \cdot \frac{N_{TP} + N_{FP}}{N_{TP} + N_{TN} + N_{FP} + N_{FN}}, \quad p_{\text{False}} = \frac{N_{TN} + N_{FN}}{N_{TP} + N_{TN} + N_{FP} + N_{FN}} \cdot \frac{N_{TN} + N_{FP}}{N_{TP} + N_{TN} + N_{FP} + N_{FN}}$$

Table S1 The brief definitions of 87 selected descriptors

| Descriptor          | Type              | Description                                                                                                                                                     |
|---------------------|-------------------|-----------------------------------------------------------------------------------------------------------------------------------------------------------------|
| PEOE_VSA7           | PEOE_VSA          | MOE Charge VSA Descriptor 7 (-0.05 <= x < 0.00)                                                                                                                 |
| BCUT2D_CHGHI        | BCUT descriptor   | highest eigenvalue weighted by gasteiger charges                                                                                                                |
| VSA_EState3         | VSA_Estate        | VSA EState Descriptor 3 ( 5.00 <= x < 5.41)                                                                                                                     |
| VSA_EState2         | VSA_Estate        | VSA EState Descriptor 2 ( 4.78 <= x < 5.00)                                                                                                                     |
| EState_VSA3         | EState_VSA        | MOE-type descriptors using EState indices and surface area contributions (developed at RD, not described in the CCG paper).                                     |
| VSA_EState10        | VSA_Estate        | VSA EState Descriptor 10 ( 11.00 <= x < inf)                                                                                                                    |
| FpDensityMorgan1    | FpDensityMorgan   | Morgan fingerprint density                                                                                                                                      |
| Chi4n               | Chi indices       | Similar to Hall Kier Chi4v, but uses nVal instead of valence.This makes a big difference after we get out of the first row.Rev. Comput. Chem. 2:367-422 (1991). |
| SlogP_VSA5          | SlogP_VSA         | MOE logP VSA Descriptor 5 ( 0.10 <= x < 0.15)                                                                                                                   |
| BCUT2D_LOGPHI       | BCUT descriptor   | highest eigenvalue weighted by crippen logP                                                                                                                     |
| BCUT2D_CHGLO        | BCUT descriptor   | lowest eigenvalue weighted by gasteiger charges                                                                                                                 |
| BCUT2D_MWLOW        | BCUT descriptor   | lowest eigenvalue weighted by atomic masses                                                                                                                     |
| BCUT2D_LOGPLO       | BCUT descriptor   | lowest eigenvalue weighted by crippen logP                                                                                                                      |
| MinAbsPartialCharge | Partial Charge    | Returns molecular charge descriptors                                                                                                                            |
| BCUT2D_MWHI         | BCUT descriptor   | highest eigenvalue weighted by atomic masses                                                                                                                    |
| MaxAbsPartialCharge | Partial Charge    | Returns molecular charge descriptors                                                                                                                            |
| PEOE_VSA11          | PEOE_VSA          | MOE Charge VSA Descriptor 11 ( 0.15 <= x < 0.20)                                                                                                                |
| BCUT2D_MRHI         | BCUT descriptor   | highest eigenvalue weighted by crippen MRR                                                                                                                      |
| PEOE_VSA9           | PEOE_VSA          | MOE Charge VSA Descriptor 9 ( 0.05 <= x < 0.10)                                                                                                                 |
| BalabanJ            | Balaban's J index | Balaban's J value for a molecule,Chem. Phys. Lett. 89:399-404 (1982).                                                                                           |
| SMR_VSA5            | SMR_VSA           | MOE MR VSA Descriptor 5 ( 2.45 <= x < 2.75)                                                                                                                     |
| Chi4v               | Chi indices       | From equations (5),(15) and (16) of Rev. Comp. Chem. vol 2, 367-422, (1991)                                                                                     |
| MolMR               | MolMR             | Wildman-Crippen MR value.Wildman and Crippen JCICS 39:868-73 (1999)                                                                                             |
| PEOE_VSA14          | PEOE_VSA          | MOE Charge VSA Descriptor 14 ( 0.30 <= x < inf)                                                                                                                 |
| SMR_VSA9            | SMR_VSA           | MOE MR VSA Descriptor 9 ( 3.80 <= x < 4.00)                                                                                                                     |
| MinAbsEStateIndex   | Estate Index      | Returns a tuple of EState indices for the molecule, Reference: Hall, Mohny and Kier. JCICS_31_76-81 (1994)                                                      |
| EState_VSA1         | EState_VSA        | MOE-type descriptors using EState indices and surface area contributions (developed at RD, not described in the CCG paper).                                     |
| BCUT2D_MRLOW        | BCUT descriptor   | lowest eigenvalue weighted by crippen MRR                                                                                                                       |
| Kappa2              | Kappa descriptors | Hall-Kier Kappa2 value                                                                                                                                          |
| SMR_VSA3            | SMR_VSA           | MOE MR VSA Descriptor 3 ( 1.82 <= x < 2.24)                                                                                                                     |
| VSA_EState9         | VSA_Estate        | VSA EState Descriptor 9 ( 7.00 <= x < 11.00)                                                                                                                    |
| EState_VSA6         | EState_VSA        | MOE-type descriptors using EState indices and surface area contributions (developed at RD, not described in the CCG paper).                                     |
| FpDensityMorgan2    | FpDensityMorgan   | Morgan fingerprint density                                                                                                                                      |
| PEOE_VSA8           | PEOE_VSA          | MOE Charge VSA Descriptor 8 ( 0.00 <= x < 0.05)                                                                                                                 |
| EState_VSA8         | EState_VSA        | MOE-type descriptors using EState indices and surface area contributions (developed at RD, not described in the CCG paper).                                     |
| EState_VSA4         | EState_VSA        | MOE-type descriptors using EState indices and surface area contributions (developed at RD, not described in the CCG paper).                                     |
| FpDensityMorgan3    | FpDensityMorgan   | Morgan fingerprint density                                                                                                                                      |
| SlogP_VSA1          | SlogP_VSA         | MOE logP VSA Descriptor 1 (-inf < x < -0.40)                                                                                                                    |
| SMR_VSA1            | SMR_VSA           | MOE MR VSA Descriptor 1 (-inf < x < 1.29)                                                                                                                       |
| PEOE_VSA2           | PEOE_VSA          | MOE Charge VSA Descriptor 2 (-0.30 <= x < -0.25)                                                                                                                |

Table S1(continued) The brief definitions of 87 selected descriptors

| Descriptor        | Type              | Description                                                                                                                                        |
|-------------------|-------------------|----------------------------------------------------------------------------------------------------------------------------------------------------|
| MaxAbsEStateIndex | Estate_Index      | Returns a tuple of EState indices for the molecule, Reference: Hall, Mohny and Kier. JCICS_31_76-81 (1993)                                         |
| HallKierAlpha     | HallKierAlpha     | The Hall-Kier alpha value for a molecule.Rev. Comput. Chem. 2:367-422 (1991).                                                                      |
| VSA_EState4       | VSA_Estate        | VSA EState Descriptor 4 ( 5.41 <= x < 5.74)                                                                                                        |
| EState_VSA2       | EState_VSA        | MOE-type descriptors using EState indices and surface area contributions (developed at RD, not described in the CCG paper).                        |
| SlogP_VSA3        | SlogP_VSA         | MOE logP VSA Descriptor 3 (-0.20 <= x < 0.00)                                                                                                      |
| fr_benzene        | fr_benzene        | Number of benzene rings                                                                                                                            |
| VSA_EState8       | VSA_Estate        | VSA EState Descriptor 8 ( 6.45 <= x < 7.00)                                                                                                        |
| SlogP_VSA2        | SlogP_VSA         | MOE logP VSA Descriptor 2 (-0.40 <= x < -0.20)                                                                                                     |
| PEOE_VSA6         | PEOE_VSA          | MOE Charge VSA Descriptor 6 (-0.10 <= x < -0.05)                                                                                                   |
| SlogP_VSA6        | SlogP_VSA         | MOE logP VSA Descriptor 6 ( 0.15 <= x < 0.20)                                                                                                      |
| SlogP_VSA10       | SlogP_VSA         | MOE logP VSA Descriptor 10 ( 0.40 <= x < 0.50)                                                                                                     |
| VSA_EState1       | VSA_Estate        | VSA EState Descriptor 1 (-inf < x < 4.78)                                                                                                          |
| VSA_EState7       | VSA_Estate        | VSA EState Descriptor 7 ( 6.07 <= x < 6.45)                                                                                                        |
| Kappa3            | Kappa descriptors | Hall-Kier Kappa2 value                                                                                                                             |
| SlogP_VSA4        | SlogP_VSA         | MOE logP VSA Descriptor 4 ( 0.00 <= x < 0.10)                                                                                                      |
| VSA_EState5       | VSA_Estate        | VSA EState Descriptor 5 ( 5.74 <= x < 6.00)                                                                                                        |
| EState_VSA9       | EState_VSA        | MOE-type descriptors using EState indices and surface area contributions (developed at RD, not described in the CCG paper).                        |
| PEOE_VSA10        | PEOE_VSA          | MOE Charge VSA Descriptor 10 ( 0.10 <= x < 0.15)                                                                                                   |
| PEOE_VSA4         | PEOE_VSA          | MOE Charge VSA Descriptor 4 (-0.20 <= x < -0.15)                                                                                                   |
| PEOE_VSA1         | PEOE_VSA          | MOE Charge VSA Descriptor 1 (-inf < x < -0.30)                                                                                                     |
| SMR_VSA10         | SMR_VSA           | MOE MR VSA Descriptor 10 ( 4.00 <= x < inf)                                                                                                        |
| EState_VSA7       | EState_VSA        | MOE-type descriptors using EState indices and surface area contributions (developed at RD, not described in the CCG paper).                        |
| FractionCSP3      | FractionCSP3      | The fraction of C atoms that are SP3 hybridized.                                                                                                   |
| VSA_EState6       | VSA_Estate        | VSA EState Descriptor 6 ( 6.00 <= x < 6.07)                                                                                                        |
| SlogP_VSA8        | SlogP_VSA         | MOE logP VSA Descriptor 8 ( 0.25 <= x < 0.30)                                                                                                      |
| NumHDonors        | NumHDonors        | Number of Hydrogen Bond Donors                                                                                                                     |
| NumHeteroatoms    | NumHeteroatoms    | Number of Heteroatoms                                                                                                                              |
| SlogP_VSA12       | SlogP_VSA         | MOE logP VSA Descriptor 12 ( 0.60 <= x < inf)                                                                                                      |
| MolLogP           | MolLogP           | Wildman-Crippen LogP value.Wildman and Crippen JCICS 39:868-73 (1999)                                                                              |
| NumHAacceptors    | NumHAacceptors    | Number of Hydrogen Bond Acceptors                                                                                                                  |
| EState_VSA10      | EState_VSA        | MOE-type descriptors using EState indices and surface area contributions (developed at RD, not described in the CCG paper).                        |
| NumRotatableBonds | NumRotatableBonds | Number of Rotatable Bonds                                                                                                                          |
| EState_VSA5       | EState_VSA        | MOE-type descriptors using EState indices and surface area contributions (developed at RD, not described in the CCG paper).                        |
| RingCount         | RingCount         | The number of rings for a molecule                                                                                                                 |
| BertzCT           | BertzCT           | A topological index meant to quantify "complexity" of molecules.J. Am. Chem. Soc. 103:3599-601 (1981).                                             |
| SMR_VSA6          | SMR_VSA           | MOE MR VSA Descriptor 6 ( 2.75 <= x < 3.05)                                                                                                        |
| fr_COO2           | fr_COO2           | Number of carboxylic acids                                                                                                                         |
| fr_allylic_oxid   | fr_allylic_oxid   | Number of allylic oxidation sites excluding steroid dienone                                                                                        |
| Ipc               | Ipc               | the information content of the coefficients of the characteristic polynomial of the adjacency matrix of a hydrogen-suppressed graph of a molecule. |

Table S1(continued) The brief definitions of 87 selected descriptors

| Descriptor            | Type                  | Description                                                                                                |
|-----------------------|-----------------------|------------------------------------------------------------------------------------------------------------|
| fr_aniline            | fr_aniline            | Number of anilines                                                                                         |
| NumAromaticRings      | NumAromaticRings      | The number of aromatic rings for a molecule                                                                |
| PEOE_VSA3             | PEOE_VSA              | MOE Charge VSA Descriptor 3 (-0.25 <= x < -0.20)                                                           |
| MinEStateIndex        | Estate Index          | Returns a tuple of EState indices for the molecule, Reference: Hall, Mohny and Kier. JCICS_31_76-81 (1991) |
| NOCcount              | NOCcount              | Number of Nitrogens and Oxygens                                                                            |
| fr_NH0                | fr_NH0                | Number of Tertiary amines                                                                                  |
| fr_phenol_noOrthoHbnd | fr_phenol_noOrthoHbnd | Number of phenolic OH excluding ortho intramolecular Hbond substituents                                    |
| qed                   | qed                   | the quantitative estimation of drug-likeness                                                               |

**Table S2 Overview of the features employed for model development**

| <b>Descriptor</b>     | <b>Abbreviation</b> | <b>Original size</b> | <b>Selected size</b> |
|-----------------------|---------------------|----------------------|----------------------|
| Molecular Descriptors | MD                  | 208                  | 87                   |
| MACCS                 | MAC                 | 167                  | 71                   |
| Pubchem               | Pub                 | 881                  | 245                  |
| KlekotaRoth           | KR                  | 4860                 | 1103                 |
| CDK Extended          | Ext                 | 1024                 | 503                  |
| Daylight              | Day                 | 1024                 | 508                  |
| CDK GraphOnly         | Gra                 | 1024                 | 405                  |
| Morgan (1024)         | M1024               | 1024                 | 512                  |
| Morgan (2048)         | M2048               | 2048                 | 1023                 |

**Table S3. The optimal hyperparameters of five algorithms**

| <b>Algorithms</b> | <b>Hyperparameters</b>                                                           |
|-------------------|----------------------------------------------------------------------------------|
| BNB               |                                                                                  |
| XGBoost           | n_estimators=100, learning_rate=0.1, gamma=0.5, max_depth=12, min_child_weight=7 |
| RF                | random_state=42, max_depth=10, n_estimators=200                                  |
| SVM               | gamma=0.01, C=1.0, kernel='rbf'                                                  |
| AdaBoost          | learning_rate=0.9, n_estimators=200, random_state=42                             |

**Table S4 Five-fold stratified cross validation performances of combinatorial models for predicting hPXR activators**

| RDKit descriptors |            |            |            |            |            |            |            | MACCS      |            |            |            |            |            |            |
|-------------------|------------|------------|------------|------------|------------|------------|------------|------------|------------|------------|------------|------------|------------|------------|
|                   | AUC        | BA         | Precision  | Recall     | F1-score   | CK         | MCC        | AUC        | BA         | Precision  | Recall     | F1-score   | CK         | MCC        |
| BNB               | 0.771±0.02 | 0.623±0.02 | 0.616±0.04 | 0.316±0.03 | 0.417±0.03 | 0.290±0.04 | 0.316±0.04 | 0.770±0.02 | 0.572±0.03 | 0.495±0.05 | 0.227±0.07 | 0.305±0.07 | 0.172±0.06 | 0.193±0.05 |
| RF                | 0.907±0.01 | 0.829±0.01 | 0.702±0.03 | 0.773±0.03 | 0.735±0.02 | 0.634±0.03 | 0.636±0.03 | 0.874±0.01 | 0.789±0.01 | 0.684±0.02 | 0.692±0.03 | 0.688±0.02 | 0.575±0.03 | 0.576±0.03 |
| SVM               | 0.848±0.01 | 0.786±0.01 | 0.550±0.02 | 0.809±0.02 | 0.654±0.02 | 0.496±0.03 | 0.517±0.02 | 0.858±0.01 | 0.785±0.01 | 0.569±0.02 | 0.783±0.03 | 0.659±0.02 | 0.509±0.02 | 0.523±0.02 |
| XGBoost           | 0.913±0.01 | 0.841±0.01 | 0.726±0.02 | 0.788±0.02 | 0.756±0.02 | 0.663±0.02 | 0.665±0.02 | 0.875±0.01 | 0.800±0.01 | 0.649±0.02 | 0.744±0.03 | 0.693±0.02 | 0.572±0.02 | 0.575±0.02 |
| AdaBoost          | 0.895±0.01 | 0.797±0.02 | 0.736±0.03 | 0.682±0.03 | 0.708±0.02 | 0.608±0.03 | 0.610±0.03 | 0.849±0.01 | 0.74±0.02  | 0.673±0.03 | 0.583±0.03 | 0.624±0.02 | 0.502±0.03 | 0.505±0.03 |

  

| Pubchem  |            |            |            |            |            |            |            | Klekota-Roth |            |            |            |            |            |            |
|----------|------------|------------|------------|------------|------------|------------|------------|--------------|------------|------------|------------|------------|------------|------------|
|          | AUC        | BA         | Precision  | Recall     | F1-score   | CK         | MCC        | AUC          | BA         | Precision  | Recall     | F1-score   | CK         | MCC        |
| BNB      | 0.766±0.02 | 0.650±0.02 | 0.561±0.04 | 0.416±0.04 | 0.477±0.03 | 0.326±0.04 | 0.332±0.04 | 0.789±0.02   | 0.657±0.02 | 0.644±0.03 | 0.392±0.04 | 0.486±0.03 | 0.359±0.04 | 0.377±0.03 |
| RF       | 0.882±0.01 | 0.795±0.01 | 0.656±0.02 | 0.727±0.03 | 0.689±0.02 | 0.570±0.03 | 0.572±0.03 | 0.831±0.02   | 0.746±0.02 | 0.628±0.02 | 0.624±0.04 | 0.625±0.03 | 0.492±0.03 | 0.492±0.03 |
| SVM      | 0.883±0.01 | 0.806±0.01 | 0.607±0.02 | 0.797±0.02 | 0.689±0.02 | 0.556±0.03 | 0.567±0.03 | 0.867±0.01   | 0.782±0.02 | 0.597±0.02 | 0.745±0.03 | 0.663±0.02 | 0.523±0.03 | 0.530±0.03 |
| XGBoost  | 0.891±0.01 | 0.812±0.01 | 0.663±0.02 | 0.763±0.02 | 0.709±0.02 | 0.595±0.03 | 0.598±0.03 | 0.864±0.01   | 0.780±0.02 | 0.622±0.02 | 0.716±0.03 | 0.665±0.02 | 0.533±0.03 | 0.536±0.03 |
| AdaBoost | 0.872±0.01 | 0.755±0.02 | 0.700±0.03 | 0.603±0.03 | 0.646±0.02 | 0.533±0.03 | 0.536±0.03 | 0.848±0.01   | 0.726±0.01 | 0.722±0.03 | 0.525±0.03 | 0.608±0.02 | 0.496±0.03 | 0.507±0.03 |

  

| CDK Extended |            |            |            |            |            |            |            | Daylight   |            |            |            |            |            |            |
|--------------|------------|------------|------------|------------|------------|------------|------------|------------|------------|------------|------------|------------|------------|------------|
|              | AUC        | BA         | Precision  | Recall     | F1-score   | CK         | MCC        | AUC        | BA         | Precision  | Recall     | F1-score   | CK         | MCC        |
| BNB          | 0.777±0.02 | 0.622±0.02 | 0.542±0.04 | 0.350±0.03 | 0.425±0.03 | 0.275±0.04 | 0.286±0.04 | 0.765±0.02 | 0.614±0.02 | 0.542±0.04 | 0.328±0.03 | 0.408±0.03 | 0.261±0.04 | 0.275±0.04 |
| RF           | 0.87±0.01  | 0.787±0.02 | 0.629±0.02 | 0.727±0.03 | 0.674±0.02 | 0.546±0.03 | 0.549±0.03 | 0.852±0.01 | 0.761±0.01 | 0.598±0.02 | 0.692±0.03 | 0.640±0.02 | 0.497±0.03 | 0.500±0.03 |
| SVM          | 0.881±0.01 | 0.811±0.01 | 0.612±0.02 | 0.804±0.02 | 0.694±0.02 | 0.564±0.02 | 0.575±0.02 | 0.872±0.01 | 0.794±0.01 | 0.586±0.02 | 0.789±0.03 | 0.672±0.02 | 0.530±0.03 | 0.542±0.03 |
| XGBoost      | 0.884±0.01 | 0.808±0.01 | 0.652±0.02 | 0.762±0.02 | 0.702±0.02 | 0.584±0.03 | 0.588±0.03 | 0.877±0.01 | 0.799±0.01 | 0.642±0.02 | 0.747±0.03 | 0.690±0.02 | 0.568±0.02 | 0.571±0.02 |
| AdaBoost     | 0.865±0.01 | 0.752±0.02 | 0.691±0.03 | 0.600±0.04 | 0.642±0.03 | 0.526±0.03 | 0.528±0.03 | 0.861±0.01 | 0.742±0.02 | 0.702±0.03 | 0.571±0.04 | 0.629±0.03 | 0.514±0.03 | 0.520±0.03 |

  

| CDK GraphOnly |            |            |            |            |            |            |            | Morgan(1024) |            |            |            |            |            |            |
|---------------|------------|------------|------------|------------|------------|------------|------------|--------------|------------|------------|------------|------------|------------|------------|
|               | AUC        | BA         | Precision  | Recall     | F1-score   | CK         | MCC        | AUC          | BA         | Precision  | Recall     | F1-score   | CK         | MCC        |
| BNB           | 0.719±0.02 | 0.565±0.01 | 0.558±0.05 | 0.182±0.03 | 0.273±0.04 | 0.165±0.03 | 0.204±0.04 | 0.806±0.02   | 0.666±0.02 | 0.638±0.03 | 0.418±0.04 | 0.504±0.03 | 0.373±0.03 | 0.388±0.03 |
| RF            | 0.803±0.02 | 0.727±0.02 | 0.485±0.03 | 0.735±0.03 | 0.584±0.02 | 0.391±0.03 | 0.410±0.03 | 0.834±0.01   | 0.757±0.01 | 0.527±0.02 | 0.757±0.03 | 0.621±0.02 | 0.450±0.03 | 0.467±0.03 |
| SVM           | 0.802±0.01 | 0.733±0.02 | 0.459±0.02 | 0.808±0.03 | 0.585±0.02 | 0.375±0.03 | 0.412±0.03 | 0.861±0.01   | 0.784±0.01 | 0.564±0.02 | 0.787±0.02 | 0.657±0.02 | 0.504±0.03 | 0.520±0.03 |
| XGBoost       | 0.818±0.02 | 0.733±0.02 | 0.497±0.02 | 0.732±0.03 | 0.592±0.02 | 0.405±0.03 | 0.422±0.03 | 0.859±0.01   | 0.776±0.02 | 0.601±0.02 | 0.724±0.03 | 0.657±0.02 | 0.518±0.03 | 0.522±0.03 |
| AdaBoost      | 0.799±0.01 | 0.626±0.02 | 0.646±0.05 | 0.315±0.03 | 0.422±0.03 | 0.301±0.03 | 0.332±0.03 | 0.848±0.01   | 0.710±0.02 | 0.686±0.03 | 0.502±0.04 | 0.579±0.03 | 0.458±0.04 | 0.468±0.04 |

  

| Morgan(2048) |            |            |            |            |            |            |            |
|--------------|------------|------------|------------|------------|------------|------------|------------|
|              | AUC        | BA         | Precision  | Recall     | F1-score   | CK         | MCC        |
| BNB          | 0.818±0.01 | 0.681±0.02 | 0.661±0.03 | 0.443±0.04 | 0.531±0.03 | 0.405±0.03 | 0.417±0.03 |
| RF           | 0.83±0.01  | 0.752±0.01 | 0.511±0.02 | 0.767±0.03 | 0.613±0.02 | 0.434±0.01 | 0.454±0.03 |
| SVM          | 0.871±0.01 | 0.791±0.01 | 0.578±0.02 | 0.791±0.03 | 0.667±0.02 | 0.521±0.03 | 0.535±0.03 |
| XGBoost      | 0.857±0.01 | 0.775±0.02 | 0.600±0.02 | 0.724±0.02 | 0.656±0.02 | 0.516±0.03 | 0.521±0.03 |
| AdaBoost     | 0.847±0.01 | 0.699±0.02 | 0.699±0.04 | 0.471±0.04 | 0.562±0.03 | 0.444±0.04 | 0.459±0.04 |



**Table S5 External validation performances of combinatorial models for predicting hPXR activators**

| RDKit descriptors |       |       |           |        |          |       |       | MACCS    |       |       |           |        |          |       |       |
|-------------------|-------|-------|-----------|--------|----------|-------|-------|----------|-------|-------|-----------|--------|----------|-------|-------|
|                   | AUC   | BA    | Precision | Recall | F1-score | CK    | MCC   |          | AUC   | BA    | Precision | Recall | F1-score | CK    | MCC   |
| BNB               | 0.649 | 0.649 | 0.627     | 0.380  | 0.473    | 0.341 | 0.359 | BNB      | 0.656 | 0.656 | 0.537     | 0.453  | 0.491    | 0.329 | 0.331 |
| RF                | 0.849 | 0.849 | 0.691     | 0.832  | 0.755    | 0.656 | 0.661 | RF       | 0.825 | 0.825 | 0.682     | 0.781  | 0.728    | 0.621 | 0.624 |
| SVM               | 0.800 | 0.800 | 0.547     | 0.854  | 0.667    | 0.508 | 0.537 | SVM      | 0.799 | 0.799 | 0.566     | 0.825  | 0.672    | 0.522 | 0.542 |
| XGBoost           | 0.860 | 0.860 | 0.728     | 0.832  | 0.777    | 0.689 | 0.692 | XGBoost  | 0.806 | 0.806 | 0.650     | 0.759  | 0.700    | 0.581 | 0.585 |
| AdaBoost          | 0.813 | 0.813 | 0.728     | 0.723  | 0.725    | 0.627 | 0.627 | AdaBoost | 0.758 | 0.758 | 0.680     | 0.620  | 0.649    | 0.530 | 0.531 |

  

| Pubchem  |       |       |           |        |          |       |       | Klekota-Roth |       |       |           |        |          |       |       |
|----------|-------|-------|-----------|--------|----------|-------|-------|--------------|-------|-------|-----------|--------|----------|-------|-------|
|          | AUC   | BA    | Precision | Recall | F1-score | CK    | MCC   |              | AUC   | BA    | Precision | Recall | F1-score | CK    | MCC   |
| BNB      | 0.720 | 0.720 | 0.588     | 0.588  | 0.588    | 0.439 | 0.439 | BNB          | 0.644 | 0.644 | 0.620     | 0.369  | 0.462    | 0.330 | 0.348 |
| RF       | 0.812 | 0.812 | 0.638     | 0.785  | 0.704    | 0.582 | 0.588 | RF           | 0.763 | 0.763 | 0.614     | 0.679  | 0.645    | 0.508 | 0.509 |
| SVM      | 0.822 | 0.822 | 0.596     | 0.850  | 0.701    | 0.566 | 0.585 | SVM          | 0.808 | 0.808 | 0.614     | 0.796  | 0.693    | 0.563 | 0.572 |
| XGBoost  | 0.845 | 0.845 | 0.674     | 0.836  | 0.746    | 0.641 | 0.648 | XGBoost      | 0.795 | 0.795 | 0.624     | 0.752  | 0.682    | 0.553 | 0.558 |
| AdaBoost | 0.782 | 0.782 | 0.713     | 0.661  | 0.686    | 0.578 | 0.579 | AdaBoost     | 0.746 | 0.746 | 0.754     | 0.558  | 0.642    | 0.537 | 0.548 |

  

| CDK Extended |       |       |           |        |          |       |       | Daylight |       |       |           |        |          |       |       |
|--------------|-------|-------|-----------|--------|----------|-------|-------|----------|-------|-------|-----------|--------|----------|-------|-------|
|              | AUC   | BA    | Precision | Recall | F1-score | CK    | MCC   |          | AUC   | BA    | Precision | Recall | F1-score | CK    | MCC   |
| BNB          | 0.659 | 0.659 | 0.534     | 0.464  | 0.496    | 0.332 | 0.333 | BNB      | 0.621 | 0.621 | 0.536     | 0.350  | 0.424    | 0.272 | 0.282 |
| RF           | 0.814 | 0.814 | 0.628     | 0.799  | 0.703    | 0.578 | 0.587 | RF       | 0.802 | 0.802 | 0.607     | 0.788  | 0.686    | 0.552 | 0.562 |
| SVM          | 0.827 | 0.827 | 0.606     | 0.854  | 0.709    | 0.579 | 0.597 | SVM      | 0.829 | 0.829 | 0.611     | 0.854  | 0.712    | 0.584 | 0.602 |
| XGBoost      | 0.829 | 0.829 | 0.643     | 0.821  | 0.721    | 0.604 | 0.613 | XGBoost  | 0.810 | 0.810 | 0.624     | 0.792  | 0.698    | 0.571 | 0.579 |
| AdaBoost     | 0.769 | 0.769 | 0.655     | 0.664  | 0.659    | 0.536 | 0.536 | AdaBoost | 0.749 | 0.749 | 0.669     | 0.606  | 0.636    | 0.514 | 0.515 |

  

| CDK GraphOnly |       |       |           |        |          |       |       | Morgan(1024) |       |       |           |        |          |       |       |
|---------------|-------|-------|-----------|--------|----------|-------|-------|--------------|-------|-------|-----------|--------|----------|-------|-------|
|               | AUC   | BA    | Precision | Recall | F1-score | CK    | MCC   |              | AUC   | BA    | Precision | Recall | F1-score | CK    | MCC   |
| BNB           | 0.566 | 0.566 | 0.542     | 0.190  | 0.281    | 0.167 | 0.201 | BNB          | 0.712 | 0.712 | 0.644     | 0.529  | 0.581    | 0.450 | 0.454 |
| RF            | 0.722 | 0.722 | 0.463     | 0.759  | 0.575    | 0.368 | 0.394 | RF           | 0.777 | 0.777 | 0.516     | 0.836  | 0.638    | 0.462 | 0.494 |
| SVM           | 0.737 | 0.737 | 0.457     | 0.828  | 0.589    | 0.376 | 0.419 | SVM          | 0.801 | 0.801 | 0.568     | 0.828  | 0.674    | 0.524 | 0.545 |
| XGBoost       | 0.748 | 0.748 | 0.495     | 0.781  | 0.606    | 0.418 | 0.443 | XGBoost      | 0.804 | 0.804 | 0.610     | 0.788  | 0.688    | 0.555 | 0.565 |
| AdaBoost      | 0.645 | 0.645 | 0.647     | 0.361  | 0.464    | 0.338 | 0.361 | AdaBoost     | 0.727 | 0.727 | 0.709     | 0.533  | 0.608    | 0.493 | 0.502 |

  

| Morgan(2048) |       |       |           |        |          |       |       |
|--------------|-------|-------|-----------|--------|----------|-------|-------|
|              | AUC   | BA    | Precision | Recall | F1-score | CK    | MCC   |
| BNB          | 0.691 | 0.691 | 0.655     | 0.471  | 0.548    | 0.419 | 0.429 |
| RF           | 0.774 | 0.774 | 0.499     | 0.858  | 0.631    | 0.446 | 0.486 |
| SVM          | 0.803 | 0.803 | 0.572     | 0.828  | 0.677    | 0.529 | 0.549 |
| XGBoost      | 0.805 | 0.805 | 0.606     | 0.796  | 0.688    | 0.554 | 0.565 |
| AdaBoost     | 0.722 | 0.722 | 0.708     | 0.522  | 0.601    | 0.485 | 0.495 |

**Table S6 Performance of in domain and out of domain chemicals in the external test set for the top ten combinatorial classification models**

**Application domain analysis based on Tanimoto similarity**

| Models             | ID    |           |        |       |       |       |       | OD    |           |        |       |       |       |       |
|--------------------|-------|-----------|--------|-------|-------|-------|-------|-------|-----------|--------|-------|-------|-------|-------|
|                    | BA    | Precision | Recall | F1    | AUC   | CK    | MCC   | BA    | Precision | Recall | F1    | AUC   | CK    | MCC   |
| RDKitMD-XGBoost    | 0.868 | 0.737     | 0.833  | 0.782 | 0.868 | 0.705 | 0.707 | 0.851 | 0.72      | 0.831  | 0.771 | 0.851 | 0.671 | 0.675 |
| RDKitMD-RF         | 0.841 | 0.685     | 0.804  | 0.74  | 0.841 | 0.645 | 0.649 | 0.856 | 0.696     | 0.86   | 0.77  | 0.856 | 0.664 | 0.672 |
| Pub-XGBoost        | 0.855 | 0.669     | 0.848  | 0.748 | 0.855 | 0.651 | 0.66  | 0.835 | 0.679     | 0.824  | 0.744 | 0.835 | 0.629 | 0.635 |
| Ext-XGBoost        | 0.855 | 0.678     | 0.841  | 0.751 | 0.855 | 0.657 | 0.664 | 0.799 | 0.609     | 0.801  | 0.692 | 0.799 | 0.545 | 0.557 |
| Day-SVM            | 0.841 | 0.634     | 0.841  | 0.723 | 0.841 | 0.614 | 0.626 | 0.814 | 0.59      | 0.868  | 0.702 | 0.814 | 0.55  | 0.575 |
| Ext-SVM            | 0.854 | 0.647     | 0.862  | 0.739 | 0.854 | 0.636 | 0.649 | 0.796 | 0.569     | 0.846  | 0.68  | 0.796 | 0.516 | 0.54  |
| MAC-RF             | 0.851 | 0.687     | 0.826  | 0.75  | 0.851 | 0.657 | 0.663 | 0.798 | 0.676     | 0.735  | 0.704 | 0.798 | 0.58  | 0.581 |
| Pub-SVM            | 0.835 | 0.609     | 0.848  | 0.709 | 0.835 | 0.592 | 0.608 | 0.805 | 0.583     | 0.853  | 0.693 | 0.805 | 0.536 | 0.559 |
| Ext-RF             | 0.84  | 0.681     | 0.804  | 0.738 | 0.84  | 0.642 | 0.646 | 0.783 | 0.581     | 0.794  | 0.671 | 0.783 | 0.51  | 0.524 |
| RDKitMD - AdaBoost | 0.818 | 0.744     | 0.717  | 0.731 | 0.818 | 0.644 | 0.644 | 0.806 | 0.712     | 0.728  | 0.72  | 0.806 | 0.607 | 0.607 |

**Application domain analysis based on Euclidean distance**

| Models             | ID    |           |        |       |       |       |       | OD    |           |        |       |       |       |       |
|--------------------|-------|-----------|--------|-------|-------|-------|-------|-------|-----------|--------|-------|-------|-------|-------|
|                    | BA    | Precision | Recall | F1    | AUC   | CK    | MCC   | BA    | Precision | Recall | F1    | AUC   | CK    | MCC   |
| RDKitMD-XGBoost    | 0.869 | 0.758     | 0.802  | 0.779 | 0.869 | 0.722 | 0.722 | 0.832 | 0.708     | 0.856  | 0.775 | 0.832 | 0.634 | 0.642 |
| RDKitMD-RF         | 0.852 | 0.729     | 0.777  | 0.752 | 0.852 | 0.687 | 0.688 | 0.819 | 0.667     | 0.876  | 0.757 | 0.819 | 0.595 | 0.611 |
| Pub-XGBoost        | 0.862 | 0.688     | 0.818  | 0.747 | 0.862 | 0.677 | 0.681 | 0.808 | 0.663     | 0.850  | 0.745 | 0.808 | 0.578 | 0.591 |
| Ext-XGBoost        | 0.864 | 0.680     | 0.826  | 0.746 | 0.864 | 0.674 | 0.680 | 0.770 | 0.616     | 0.817  | 0.702 | 0.770 | 0.503 | 0.517 |
| Day-SVM            | 0.852 | 0.643     | 0.818  | 0.720 | 0.852 | 0.639 | 0.646 | 0.775 | 0.590     | 0.882  | 0.707 | 0.775 | 0.493 | 0.525 |
| Ext-SVM            | 0.864 | 0.650     | 0.843  | 0.734 | 0.864 | 0.656 | 0.665 | 0.759 | 0.576     | 0.863  | 0.691 | 0.759 | 0.466 | 0.496 |
| MAC-RF             | 0.864 | 0.697     | 0.818  | 0.753 | 0.864 | 0.684 | 0.688 | 0.775 | 0.669     | 0.752  | 0.708 | 0.775 | 0.534 | 0.537 |
| Pub-SVM            | 0.845 | 0.628     | 0.810  | 0.708 | 0.845 | 0.622 | 0.630 | 0.764 | 0.574     | 0.882  | 0.696 | 0.764 | 0.470 | 0.506 |
| Ext-RF             | 0.838 | 0.674     | 0.769  | 0.718 | 0.838 | 0.641 | 0.644 | 0.761 | 0.597     | 0.824  | 0.692 | 0.761 | 0.480 | 0.499 |
| RDKitMD - AdaBoost | 0.801 | 0.741     | 0.661  | 0.699 | 0.801 | 0.628 | 0.63  | 0.804 | 0.72      | 0.771  | 0.744 | 0.804 | 0.598 | 0.599 |

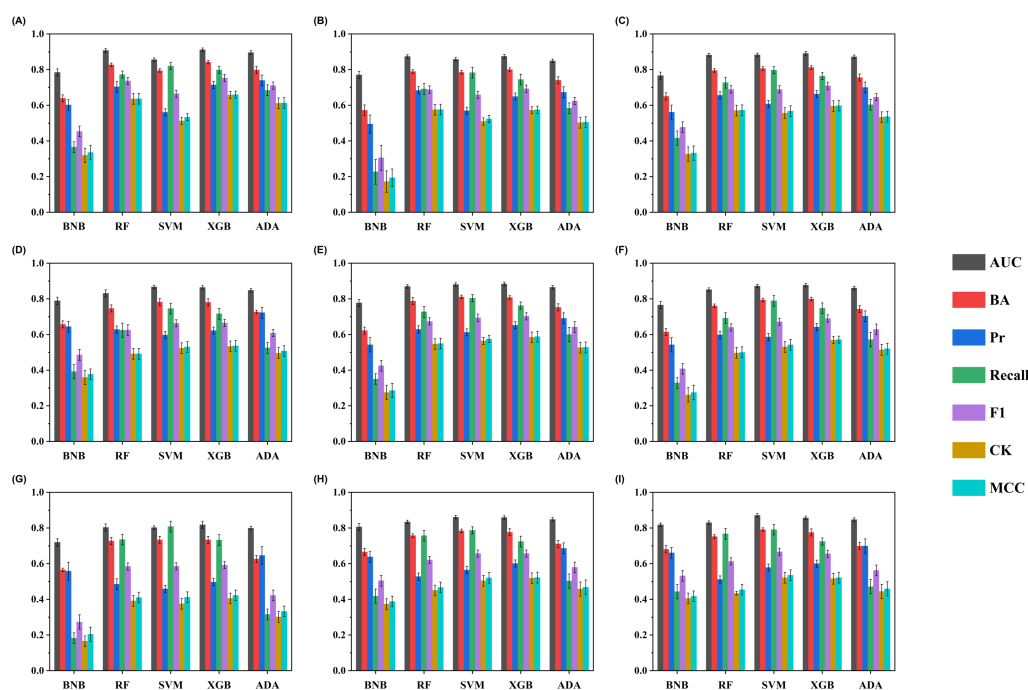

Figure S1. Five-fold repeated stratified cross validation performances of individual models constructed by five machine learning algorithms and nine molecular features. The sub-figures show the results using nine molecular features. The y-axis gives the performance values and different metrics are depicted by colors. Five machine learning algorithms are grouped and labeled at the x-axis. (A) RDKit molecular descriptors (B) MACCS fingerprint (C) Pubchem fingerprint (D) KlekotaRoth fingerprint (E) CDK Extended fingerprint (F) Daylight fingerprint (G) CDK GraphOnly fingerprint (H) Morgan (1024) fingerprint (I) Morgan (2048) fingerprint
